# Supplementary material for: A host basal transcription factor is a key component for infection of rice by TALE-carrying bacteria
Source: eLife. 2016 Jul 29;5:e19605. doi: 10.7554/eLife.19605 (PMC4993585; doi:10.7554/eLife.19605)
Supplement: Figure 3—source data 1. — DOI: http://dx.doi.org/10.7554/eLife.19605.011 [file elife-19605-fig3-data1.doc]

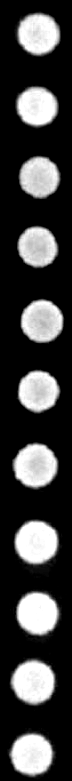

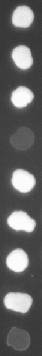


**Lesion length (cm)**


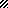

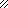

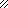

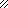

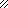

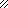


TFB-m1

TFB-m3

TFB-m1

TFB-m3


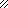

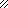

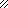

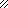

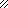


TFBPthXo1

SIVAQ**L**SRPDPA**L**AA**L**TNDH**L**VA**L**AC**L**GGRPAMDAVKKG**L**PHAPE**L**IRRV

NRRIGERTSHRVADYAQVVRV**L**EFFQCHSHPAYAFDEAMTQFGMSRNG**L**V

Q**L**FRRVGVTE**L**EARGGT**L**PPASQRWDRI**L**QASGM

TFB-m1

SIVAQ**A**SRPDPA**A**AA**A**TNDH**A**VA**A**AC**A**GGRPAMDAVKKG**A**PHAPE**A**IRRV

NRRIGERTSHRVADYAQVVRVLEFFQCHSHPAYAFDEAMTQFGMSRNGLV

QLFRRVGVTELEARGGTLPPASQRWDRILQASGM

TFB-m2

SIVAQLSRPDPALAALTNDHLVALACLGGRPAMDAVKKGLPHAPELIRRV

NRRIGERTSHRVADYAQVVRV**A**EFFQCHSHPAYAFDEAMTQFGMSRNG**A**V

Q**A**FRRVGVTE**A**EARGGT**A**PPASQRWDRI**A**QASGM

TFB-m3

SIVAQ**A**SRPDPA**A**AA**A**TNDH**A**VA**A**AC**A**GGRPAMDAVKKG**A**PHAPE**A**IRRV

NRRIGERTSHRVADYAQVVRV**A**EFFQCHSHPAYAFDEAMTQFGMSRNG**A**V

Q**A**FRRVGVTE**A**EARGGT**A**PPASQRWDRI**A**QASGM

**Figure 3—source data 1.** Effects of leucine residues of PthXo1 TFB region on TALE-mediated infection.(**A**) Mutation of the leucine (L) residues (blue colored) of PthXol TFB region (TFBPthXo1) with alanine (A, red colored). (**B**) Mutation of the leucine residues did not influence the interaction between mutated TFB regions and TFIIA5 in yeast cells. The interactions were assessed by growth of yeast cells on synthetic defined premixes (SD) medium lacking (-) leucine (L), tryptophan (W), histidine (H), and adenine (A). (**C**) Mutation of leucine residues of PthXo1 TFB region did not change the virulence of *Xoo* strains in near-isogenic lines IR24 and IRBB5 compared to strain T7174(PthXo1-TFBPthXo1) or KACC10331(PthXo1-TFBPthXo1). Each bar represents mean (total 35 to 40 leaves from 5 plants)  standard deviation. b, significant difference between wild-type T7174 or KACC10331 and recombinant strains in each rice line at *P* < 0.01.

**A**

IR24 (*TFIIA5*)

IRBB5 (*TFIIA5V39E*)

b

**C**

T7174(PthXo1-TFB)

0

5

10

15

20

25

30

b

T7174

TFBPthXo1

TFB-m2

b

KACC10331 (PthXo1-TFB)

0

5

10

15

b

TFBPthXo1

TFB-m2

KACC10331

b

b

b

b

b

b

b

b

b

b

b

b

***Xoo* strain**

***Xoo* strain**

**B**

SD/-LW

p53 (control) RecT

lamin C (control) RecT

TFBPthXo1(wild type) TFIIA5

DNA-binding domain vector

Activation domain vector

SD/-LWHA

TFB-m1 TFIIA5

TFB-m2 TFIIA5

TFB-m3 TFIIA5
