# Supplementary material for: A host basal transcription factor is a key component for infection of rice by TALE-carrying bacteria
Source: eLife journal article supplement (doi:10.7554/elife.19605), 2016-07-29
Supplement: supp [file elife-19605-supp-v1.zip]

Archive with 19 entries (19 files):
- elife_poa_e19605_Supplementary_File_2.doc
- elife_poa_e19605_Figure_5_Figure_Supplement_1.pdf
- elife_poa_e19605_Figure_3_Figure_Supplement_1.pdf
- elife_poa_e19605_Figure_3_source_data_1.doc
- elife_poa_e19605_Figure_4_Figure_Supplement_4.pdf
- elife_poa_e19605_Figure_4_Figure_Supplement_3.pdf
- elife_poa_e19605_Figure_1_Figure_Supplement_1.pdf
- elife_poa_e19605_Figure_1_Figure_Supplement_2.pdf
- elife_poa_e19605_Figure_2_source_data_1.doc
- elife_poa_e19605_Supplementary_File_3.doc
- elife_poa_e19605_Figure_2_Figure_Supplement_1.pdf
- elife_poa_e19605_Figure_4_source_data_3.doc
- elife_poa_e19605_Figure_4_Figure_Supplement_2.pdf
- elife_poa_e19605_Figure_4_source_data_1.doc
- elife_poa_e19605_Figure_5_Figure_Supplement_2.pdf
- elife_poa_e19605_Figure_4_source_data_2.doc
- elife_poa_e19605_Figure_2_source_data_2.doc
- elife_poa_e19605_Figure_4_Figure_Supplement_1.pdf
- elife_poa_e19605_Supplementary_File_1.doc
