# Supplementary material for: A host basal transcription factor is a key component for infection of rice by TALE-carrying bacteria
Source: eLife journal article supplement (doi:10.7554/elife.19605), 2016-07-29
Supplement: supp [file elife-19605-supp-v1.zip]

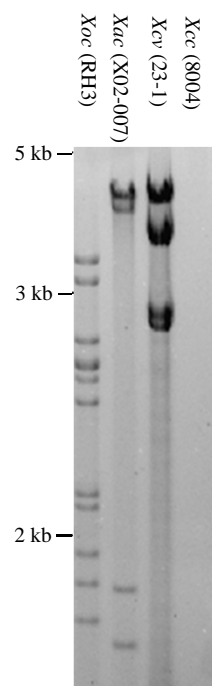

**Figure 5—figure supplement 1.** Southern hybridization analysis of TALE genes in different *Xanthomonas* species. DNA was digested with *Sph*I and probed with the 2.9-kb *Sph*I fragment of TALE gene *pthXo1* from *Xoo* strain PXO99. The size positions of DNA markers are indicated at left. *Xac*, *Xanthomonas axonopodis* pv. *citri*; *Xcv*, *Xanthomonas euvesicatoria*; *Xoc*, *Xanthomonas oryzae* pv. *oryzicola*; *Xcc*, *Xanthomonas campestris* pv. *campestris*. The *Xcc* strain 8004 is TALE-free (Qian et al., 2005, Genome Res. 15:757-767).
