# Supplementary material for: A host basal transcription factor is a key component for infection of rice by TALE-carrying bacteria
Source: eLife journal article supplement (doi:10.7554/elife.19605), 2016-07-29
Supplement: supp [file elife-19605-supp-v1.zip]

| DNA-binding<br>domain vector | Activation<br>domain<br>vector        | SD/<br>-LW | SD/-L<br>WHA | X- $\alpha$ -<br>gal |
|------------------------------|---------------------------------------|------------|--------------|----------------------|
| p53 (control)                | RecT                                  |            |              |                      |
| lamin C (control)            | RecT                                  |            |              |                      |
| TFB                          | TFIIA $\gamma$ 1                      |            |              |                      |
| TFB                          | TFIIA $\gamma$ 1 <sup>D18E</sup>      |            |              |                      |
| TFB                          | TFIIA $\gamma$ 1 <sup>D22E</sup>      |            |              |                      |
| TFB                          | TFIIA $\gamma$ 1 <sup>A28T</sup>      |            |              |                      |
| TFB                          | TFIIA $\gamma$ 1 <sup>S47E</sup>      |            |              |                      |
| TFB                          | TFIIA $\gamma$ 1 <sup>T58S</sup>      |            |              |                      |
| TFB                          | TFIIA $\gamma$ 1 <sup>V59I</sup>      |            |              |                      |
| TFB                          | TFIIA $\gamma$ 1 <sup>D18E,D22E</sup> |            |              |                      |
| TFB                          | TFIIA $\gamma$ 1 <sup>T58S,V59I</sup> |            |              |                      |

**Figure 4—figure supplement 2.** Interactions between the TFB region of TALE PthXo1 and mutated TFIIA $\gamma$ 1s in yeast cells. The interactions were assessed by growth of yeast cells on synthetic defined premixes (SD) medium lacking leucine (L), tryptophan (W), histidine (H), and adenine (A).
