# Supplementary material for: A host basal transcription factor is a key component for infection of rice by TALE-carrying bacteria
Source: eLife journal article supplement (doi:10.7554/elife.19605), 2016-07-29
Supplement: supp [file elife-19605-supp-v1.zip › elife_poa_e19605_Figure_1_Figure_Supplement_1.pdf]

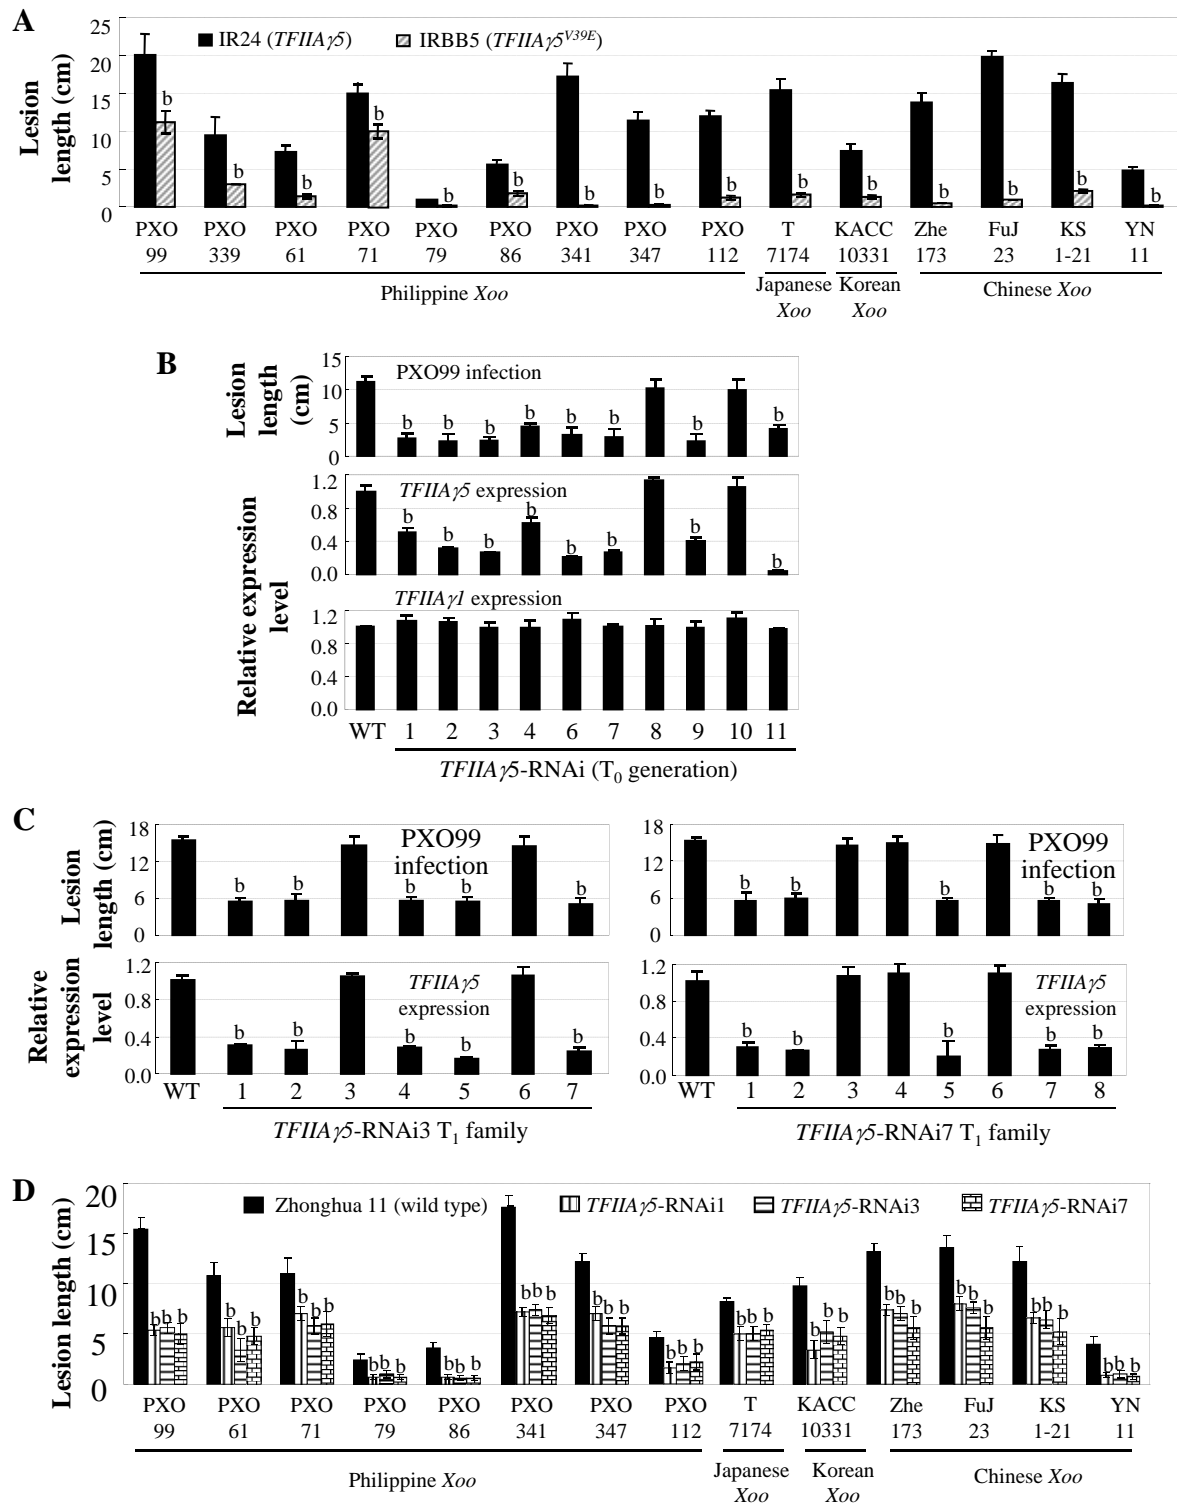

**Figure 1—figure supplement 1.** Effects of *TFIIAγ5* on rice resistance to *Xoo* strains known to carry TALEs. Rice plants at the booting (panicle development) stage were inoculated with *Xoo*. (A) The near-isogenic lines IR24 and IRBB5 showed different responses to the infection of *Xoo*. IRBB5 in IR24 background carries a natural mutated *TFIIAγ5*, *TFIIAγ5<sup>V39E</sup>*. Each bar represents mean (total 17 to 29 leaves from 5 plants)  $\pm$  standard deviation. b, significant difference between IR24 and IRBB5 at  $P < 0.01$ . (B) The enhanced resistance of *TFIIAγ5*-RNAi plants to strain PXO99 was associated with reduced transcription of *TFIIAγ5* but not *TFIIAγ1*. WT, wild-type Zhonghua 11. Each bar represents mean (3 replicates for gene expression and total 5 to 10 leaves from one plant for lesion length)  $\pm$  standard deviation. b, significant difference between wild-type (WT) and transgenic plants at  $P < 0.01$ . (C) The enhanced resistance of *TFIIAγ5*-RNAi plants co-segregated with reduced *TFIIAγ5* transcription in  $T_1$  families. Each bar represents mean (3 replicates for gene expression and 5 to 10 leaves from one plant for lesion length)  $\pm$  standard deviation. b, significant difference between WT and transgenic plants at  $P < 0.01$ . (D) *TFIIAγ5*-RNAi plants showed enhanced resistance to all the *Xoo* strains. Each bar represents mean (total 35 to 40 leaves from 5 plants)  $\pm$  standard deviation. b, significant difference between WT and transgenic plants at  $P < 0.01$ .
