# Supplementary material for: A host basal transcription factor is a key component for infection of rice by TALE-carrying bacteria
Source: eLife journal article supplement (doi:10.7554/elife.19605), 2016-07-29
Supplement: supp [file elife-19605-supp-v1.zip › elife_poa_e19605_Figure_1_Figure_Supplement_2.pdf]

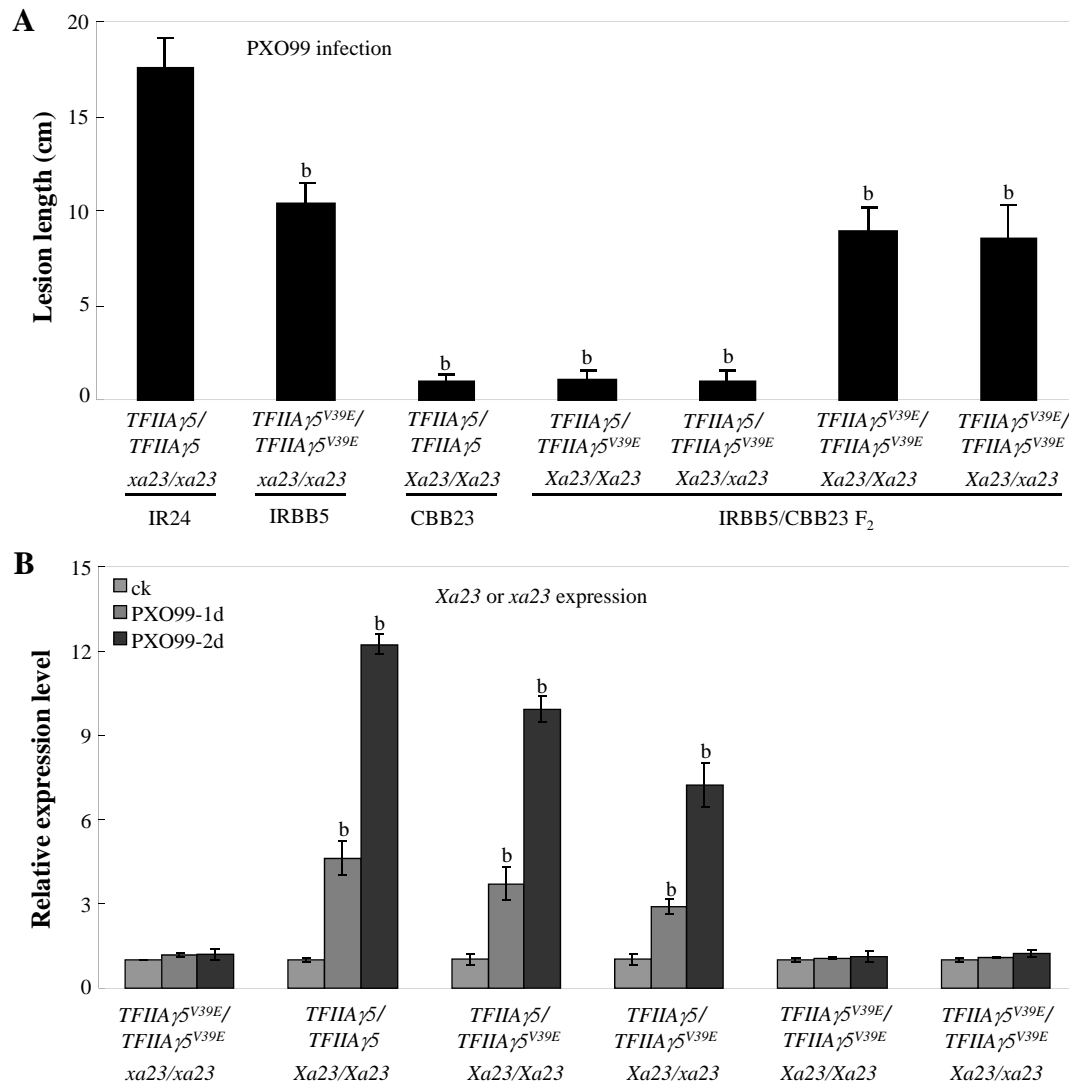

**Figure 1—figure supplement 2.** Effect of *TFIIAγ5* on *Xa23*-mediated resistance to *Xoo* strain PXO99. Each bar represents mean (total 40 to 45 leaves from 5 plants for lesion length and 3 replicates for gene expression)  $\pm$  standard deviation. **(A)** *Xa23*-mediated resistance required the presence of *TFIIAγ5*/*TFIIAγ5* or *TFIIAγ5*/*TFIIAγ5<sup>V39E</sup>*. Rice plants at the booting stage were inoculated with *Xoo*. b, significant difference between IR24 and other plants at  $P < 0.01$ . **(B)** PXO99 infection-induced *Xa23* expression required the presence of *TFIIAγ5*/*TFIIAγ5* or *TFIIAγ5*/*TFIIAγ5<sup>V39E</sup>*. b, significant difference between non-inoculated plants (ck) and PXO99-inoculated plants within each rice line at  $P < 0.01$ . 1d and 2d, 1 day or 2 days after inoculation of PXO99.
