# Supplementary material for: A host basal transcription factor is a key component for infection of rice by TALE-carrying bacteria
Source: eLife journal article supplement (doi:10.7554/elife.19605), 2016-07-29
Supplement: supp [file elife-19605-supp-v1.zip › elife_poa_e19605_Figure_2_Figure_Supplement_1.pdf]

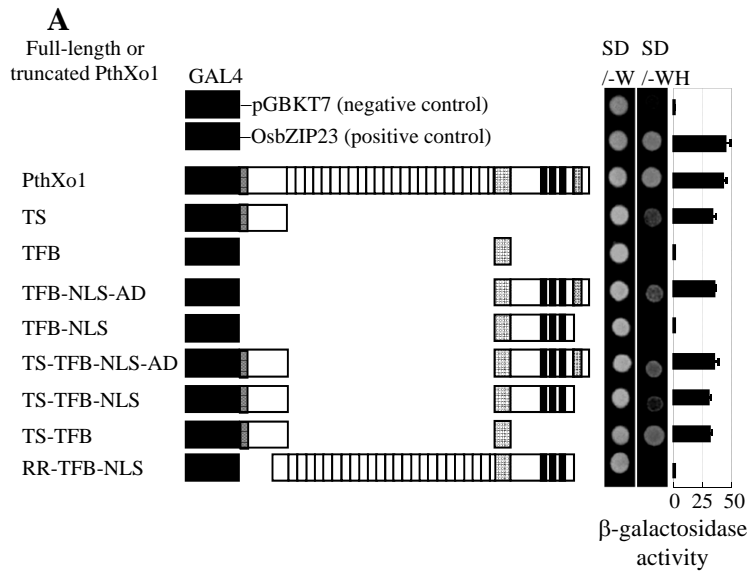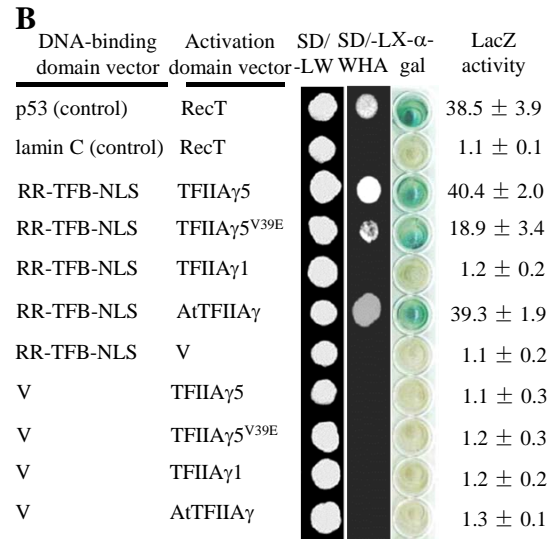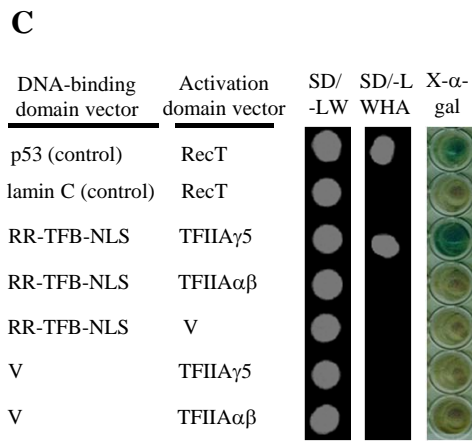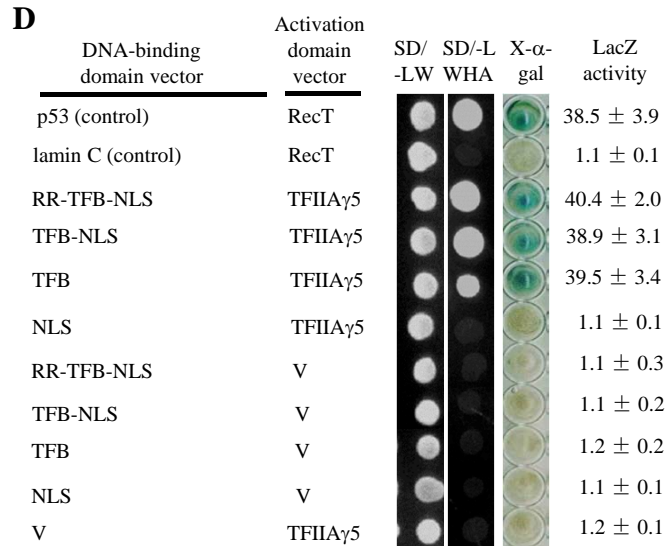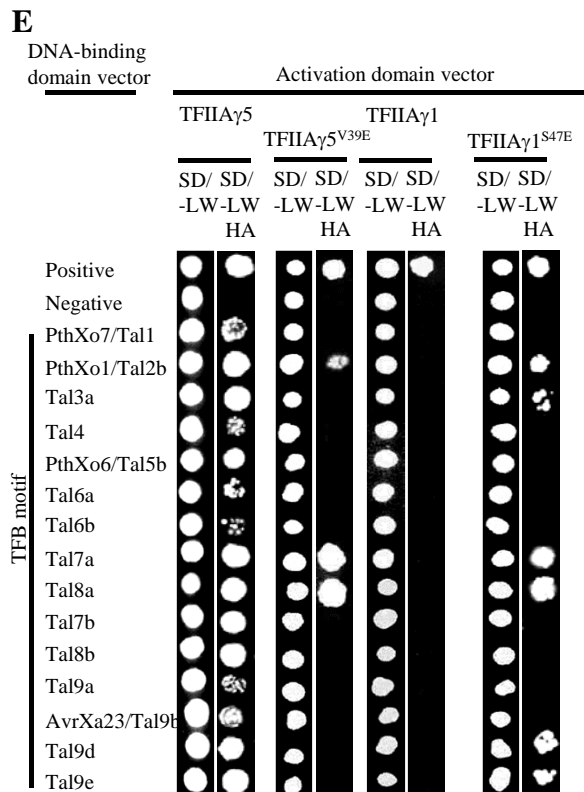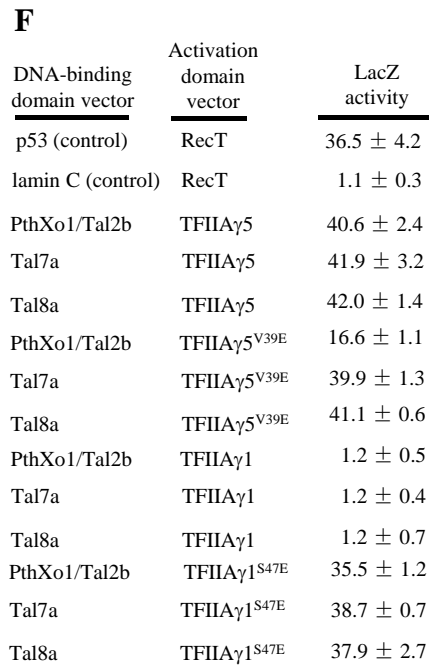

**Figure 2—figure supplement 1.** Interactions between *Xoo* TALEs and plant TFIIA $\gamma$ s in yeast cells. The interactions were assessed by growth of yeast cells on synthetic defined premixes (SD) medium lacking (-) leucine (L), tryptophan (W), histidine (H), and adenine (A). V, empty vector as control. TS, translocation signal; RR, repeat region; TFB, transcription factor binding region; NLS, nuclear localization signal; AD, transcription activation domain. (A) Examination of transactivation activity of different domains and motifs of TALE PthXo1. The full-length and truncated PthXo1 were separately fused to the DNA-binding domain of GAL4, which is a yeast transcription factor, and transformed into yeast. (B) Truncated PthXo1 (RR-TFB-NLS) interacted with rice TFIIA $\gamma$ 5 and TFIIA $\gamma$ 5<sup>V39E</sup> (mutated TFIIA $\gamma$ 5) and Arabidopsis AtTFIIA $\gamma$  analysed by yeast two-hybrid (Y2H) assay. (C) Truncated PthXo1 did not interact with rice basal transcription factor TFIIA $\alpha\beta$  analysed by Y2H assay. (D) The TFB region of PthXo1 was required for the interaction with TFIIA $\gamma$ 5 analysed by Y2H assay. (E) The TFB regions of TALEs differentially interacted with rice TFIIA $\gamma$ s. The TFB regions of all the 15 TALEs from *Xoo* strain PXO99 interacted with rice TFIIA $\gamma$ 5, and the TFB regions of some of the 15 TALEs interacted with the mutated TFIIA $\gamma$ s from rice (TFIIA $\gamma$ 5<sup>V39E</sup> and TFIIA $\gamma$ 1<sup>S47E</sup>) analysed by Y2H assay. The Tal6b is a putative non-functional TALE. (F) The TFB regions of TALEs interacted with rice TFIIA $\gamma$ s with different strength based on the analysis of LacZ activity.
