# Supplementary material for: A host basal transcription factor is a key component for infection of rice by TALE-carrying bacteria
Source: eLife journal article supplement (doi:10.7554/elife.19605), 2016-07-29
Supplement: supp [file elife-19605-supp-v1.zip › elife_poa_e19605_Figure_3_Figure_Supplement_1.pdf]

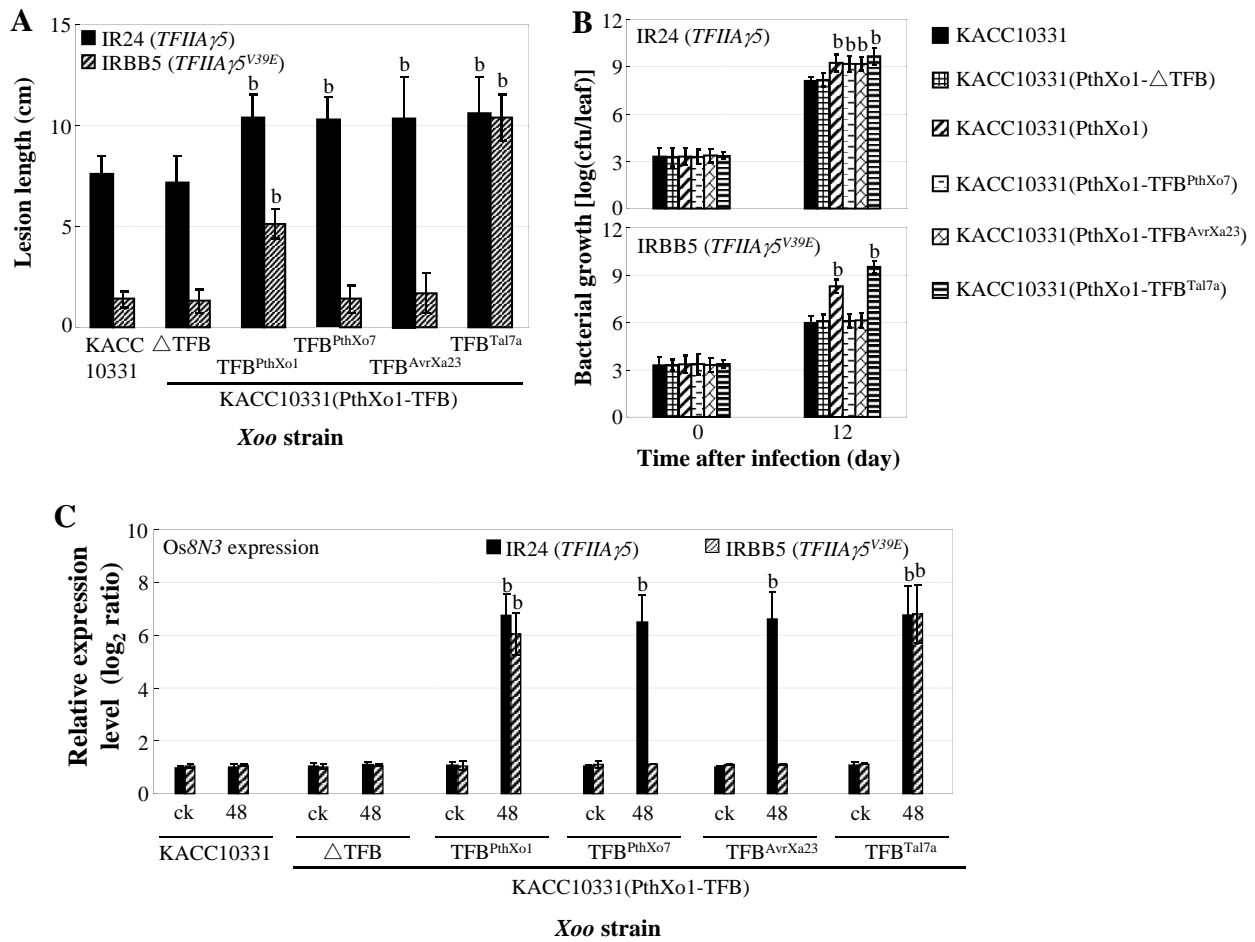

**Figure 3—figure supplement 1.** Effects of the TFB region of TALE PthXo1 on the virulence of *Xoo* strains and on the expression of rice susceptibility gene in rice-*Xoo* interaction. Each bar represents mean (total 30 to 35 leaves from five plants for lesion length; three replicates for gene expression and bacterial growth rate)  $\pm$  standard deviation. **(A)** Virulence of wild-type strain KACC10331 and recombinant strains carrying PthXo1 and its derivatives in near-isogenic lines IR24 and IRBB5. b, significant difference between T7174 and recombinant strains in each rice line at  $P < 0.01$ . **(B)** Growth of different strains in rice leaves. b, significant difference between 0 day (30 minutes after infection) and 12 days after infection of each strain at  $P < 0.01$ . **(C)** Expression of susceptibility gene *Os8N3* after infection of different strains. b, significant difference between non-inoculated (ck) and inoculated (at 48 h after infection of a strain) plants in each rice line at  $P < 0.01$ .
