# Supplementary material for: A host basal transcription factor is a key component for infection of rice by TALE-carrying bacteria
Source: eLife journal article supplement (doi:10.7554/elife.19605), 2016-07-29
Supplement: supp [file elife-19605-supp-v1.zip › elife_poa_e19605_Figure_4_Figure_Supplement_3.pdf]

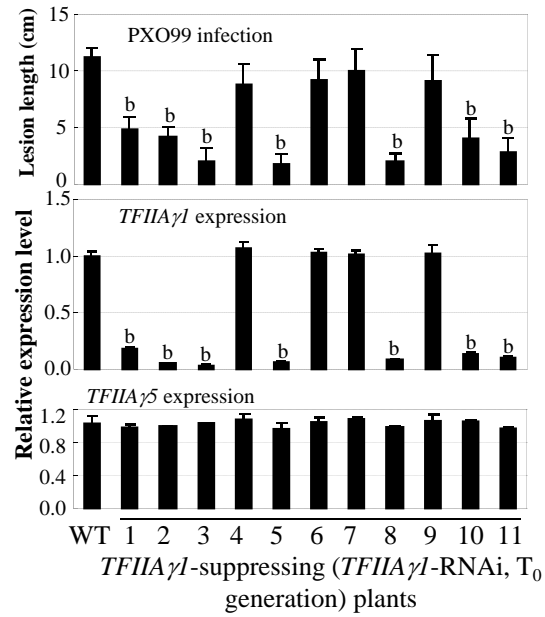

**Figure 4—figure supplement 3.** Effect of suppressing *TFIIAγ1* on rice resistance to *Xoo* strain PXO99. Plants were inoculated with PXO99 at the booting stage. RNA was isolated from the flag leaves. WT, wild-type Zhonghua 11. Each bar represents mean (3 replicates for gene expression and 5 to 10 leaves from one plant for lesion length)  $\pm$  standard deviation. b, significant difference between WT and transgenic plants at  $P < 0.01$ .
