# Supplementary material for: A host basal transcription factor is a key component for infection of rice by TALE-carrying bacteria
Source: eLife journal article supplement (doi:10.7554/elife.19605), 2016-07-29
Supplement: supp [file elife-19605-supp-v1.zip › elife_poa_e19605_Figure_4_Figure_Supplement_4.pdf]

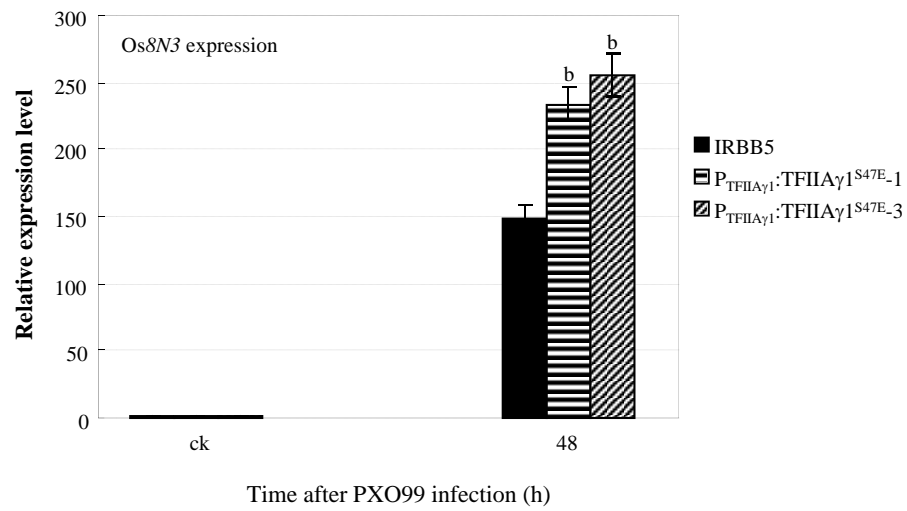

**Figure 4—figure supplement 4.** Effect of mutation of *TFIIA $\gamma$ 1* on the expression of disease susceptibility gene *Os8N3* after *Xoo* infection. Plants were inoculated with *Xoo* PXO99 at the booting stage. Each bar represents mean (3 replicates)  $\pm$  standard deviation. b, significant difference between IRBB5 and transgenic plants at  $P < 0.01$ . ck, before *Xoo* inoculation.
