# Supplementary material for: A host basal transcription factor is a key component for infection of rice by TALE-carrying bacteria
Source: eLife journal article supplement (doi:10.7554/elife.19605), 2016-07-29
Supplement: supp [file elife-19605-supp-v1.zip › elife_poa_e19605_Figure_5_Figure_Supplement_2.pdf]

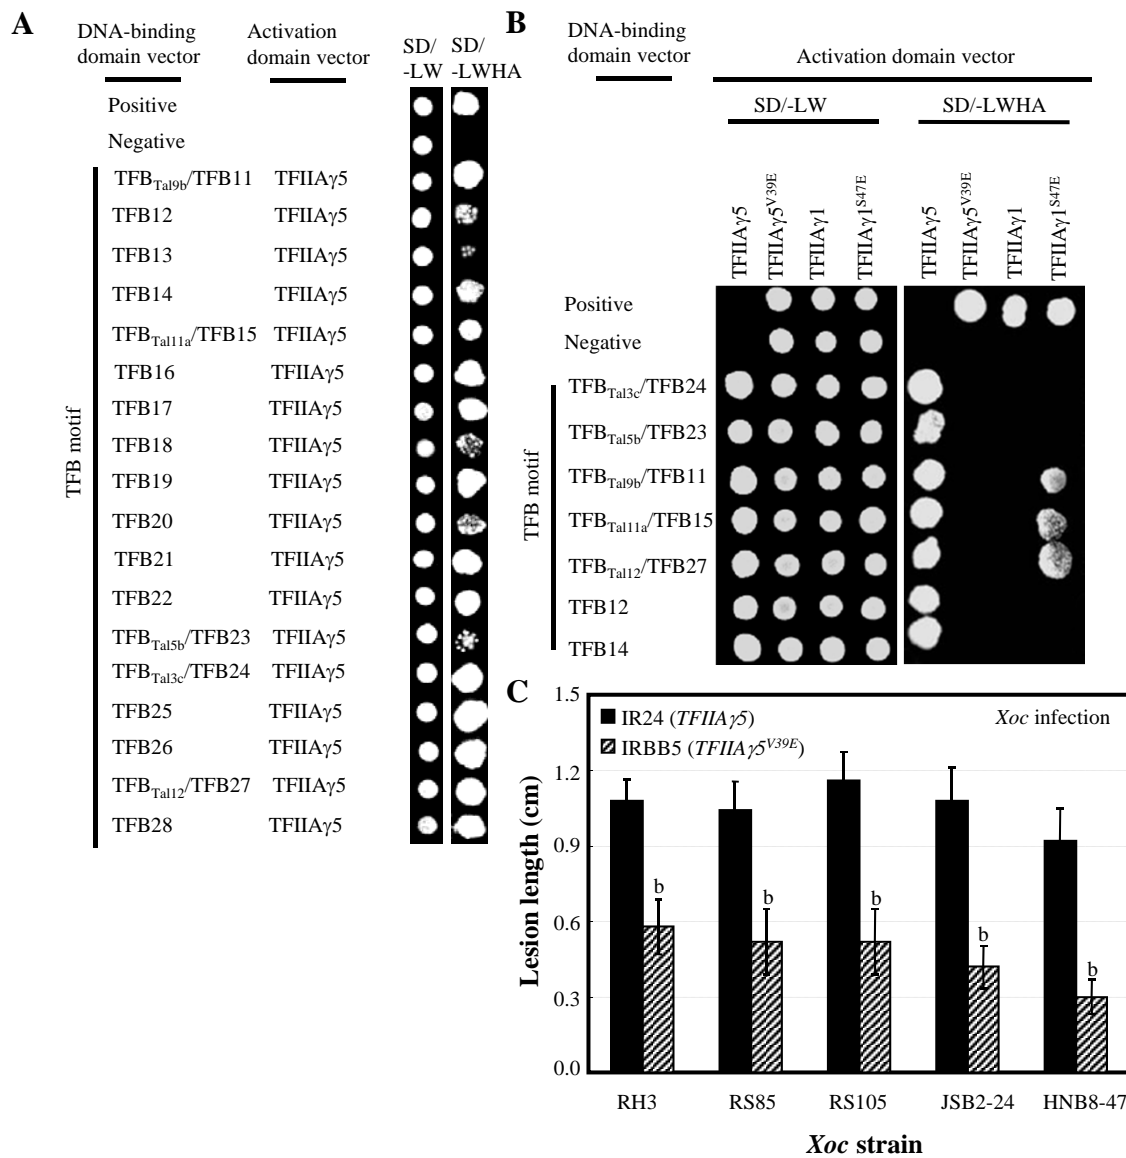

**Figure 5—figure supplement 2.** Analysis of interactions between *Xoc* TALEs with rice TFIIA $\gamma$ s. The physical interactions between TFB regions of TALEs from *Xoc* RH3 and TFIIA $\gamma$ s were assessed by growth of yeast cells on synthetic defined premixes (SD) medium lacking leucine (L), tryptophan (W), histidine (H), and adenine (A). Among the 18 TFB regions, the sequences of TFB11, TFB15, TFB23, TFB24, and TFB27 from RH3 were the same as the TFB regions of Tal9b, Tal11a, Tal5b, Tal3c, and Tal12 from sequenced *Xoc* strain BLS256, respectively. (A) The TFB regions from RH3 interacted with rice TFIIA $\gamma$ 5 analysed using yeast two-hybrid assay. (B) A randomly chosen 7 of the 18 TFB regions did not interact with TFIIA $\gamma$ 5<sup>V39E</sup> (the mutated TFIIA $\gamma$ 5), but three interacted with mutated rice TFIIA $\gamma$ 1<sup>S47E</sup> analysed by yeast two-hybrid assay. (C) Mutation of TFIIA $\gamma$ 5 enhanced resistance to *Xoc*. Plants were inoculated with *Xoc* at the booting stage. Each bar represents mean (total 40 to 50 leaves from 5 plants)  $\pm$  standard deviation. b, significant difference between IR24 and IRBB5 plants at  $P < 0.01$ .
