# Supplementary material for: A host basal transcription factor is a key component for infection of rice by TALE-carrying bacteria
Source: eLife. 2016 Jul 29;5:e19605. doi: 10.7554/eLife.19605 (PMC4993585; doi:10.7554/eLife.19605)
Supplement: Supplementary file 2. — DOI: http://dx.doi.org/10.7554/eLife.19605.026 [file elife-19605-supp2.doc]

**Supplementary file 2.** PCR primers used for construction of vectors for protein–protein interactions and transformation, and detection of positive transgenic plants

aThe underlined nucleotides are the digestion site of *Spe*I.

| Gene (accession number) | Forward primer (5’-3’) | Reverse primer (5’-3’) | Product size (nt) | Use |
| --- | --- | --- | --- | --- |
| *TFIIAγ5/Xa5* (AK065182) | AGACTAGTaGGTACCbATTGATAACTGCGAGGTCAG | AAGAGCTCcGGATCCdTACATACAAAGAGTCACACAG | 312 | Amplifying cDNA fragment for constructing RNAi construct |
|  | CCGGAATTCeATGGCCACCTTCGAGCTC | CGCGGATCCdTTATTGGCTGAGTAGTTTG | 321 | Amplifying cDNA fragment for constructing yeast two hybrid construct |
|  | CGGGGTACCbATGGCCACCTTCGAGCTCTACCGGAGG | CGCGGATCCdTTGGCTGAGTAGTTTGGAATCACAGG | 318 | Amplifying cDNA fragment for constructing expressing construct |
| *TFIIA1* (CB097192) | AGACTAGTaGGTACCbAAAGAAGAGTAATTTGCGG | AAGAGCTCcGGATCCdGAGCACACTCATGTCACAC | 269 | Amplifying cDNA fragment for constructing RNAi construct |
|  | CCGGAATTCeATGGCCACCTTCGAGCTC | CGCGGATCCdTTACTCTTCTTTAGTCTC | 330 | Amplifying cDNA fragment for constructing yeast two hybrid construct |
|  | CGGGGTACCbATGGCCACCTTCGAGCTGTACCGGAGG | CGCGGATCCdCTCTTCTTTAGTCTCCAGCAATTTGG | 327 | Amplifying cDNA fragment for constructing expressing construct |
|  | CGGGGTACCbATGGCCACCTTCGAGCTGTACCGGAGG | CACCTGATGCTCCAAAGCCTCAGTCATGG | 159 | Amplifying cDNA fragment for constructing site-directed mutation expressing construct |
|  | GCTTTGGAGCATCAGGTGAAGAGCAAGG | CGCGGATCCdCTCTTCTTTAGTCTCCAGCAATTTGG | 189 | Amplifying cDNA fragment for constructing site-directed mutation expressing construct |
| *TFIIA* (AK065373) | CCGGAATTCeATGGCCAGCAGCAACGTCTCCACG | CGCGGATCCdTCAAAAATCAAATTCGCCGGTAGC | 1185 | Amplifying cDNA fragment for constructing yeast two hybrid construct |
| *pthXo1* (CP000967) | CCCAAGCTTgGGTGTGTTTGGTGAATTTTGCAG | GCTCTAGAhTTGTCTCAAGGCGCAGAAATGATCT | 5487 | Amplifying DNA fragment |
|  | CCGGAATTCeGTGCAATCGGGTCTGCG | GCGTCGACiGGTTCAGGGGGGCACCCGT | 546 | Amplifying DNA fragment encoding TS of PthXo1 |
|  | GCGTCGACiAGAGCATTGTTGCCCAG | AACTGCAGjGTCAGATCGTCCCTCCGAC | 861 | Amplifying DNA fragment encoding from TFB to AD of PthXo1 |
|  | GCGTCGACiAGAGCATTGTTGCCCAG | AACTGCAGjGCCACATCACGGTGCTGG | 741 | Amplifying DNA fragment encoding from TFB to NLS of PthXo1 |
| *TFB* | CCGGAATTCeAGCATTGTTGCCCAGTTATCTCG | CGCGGATCCdCATCCCTGATGCCTGGAGGATAC | 402 | Amplifying DNA fragment from different TALEs for constructing yeast two hybrid constructs |
|  | CGGGGTACCbATGAGCATTGTTGCCCAGTTATC | TCCCCCGGGkCATCCCTGATGCCTGGAGGATAGC | 405 | Amplifying DNA fragment from different TALEs for constructing expressing construct |
| *9myc* (AY788908) | TCCCCCGGGkGGTGAACAAAAGTTGATTTCTGAAG | GGAAGATCTlTCATCCGTTCAAGTCTTCTTCTGAG | 351 | Amplifying DNA fragment for constructing expressing construct |

bThe underlined nucleotides are the digestion site of *Kpn*I.

cThe underlined nucleotides are the digestion site of *Sac*I.

dThe underlined nucleotides are the digestion site of *Bam*HI.

eThe underlined nucleotides are the digestion site of *Eco*RI.

fThe underlined nucleotides are the digestion site of *Xho*I.

gThe underlined nucleotides are the digestion site of *Hin*dIII.

hThe underlined nucleotides are the digestion site of *Xba*I.

iThe underlined nucleotides are the digestion site of *Sal*I.

jThe underlined nucleotides are the digestion site of *Pst*I.

kThe underlined nucleotides are the digestion site of *Sma*I.

lThe underlined nucleotides are the digestion site of *Bgl*II.
